# Supplementary material for: A functional variant of SHARPIN confers increased risk of late-onset Alzheimer’s disease
Source: PubMed Central journal article supplement (PMC8948087; doi:10.1038/s10038-021-00987-x), 2021-11-05
Supplement: 10038_2021_987_MOESM4_ESM.pdf [file 10038_2021_987_MOESM4_ESM.pdf]

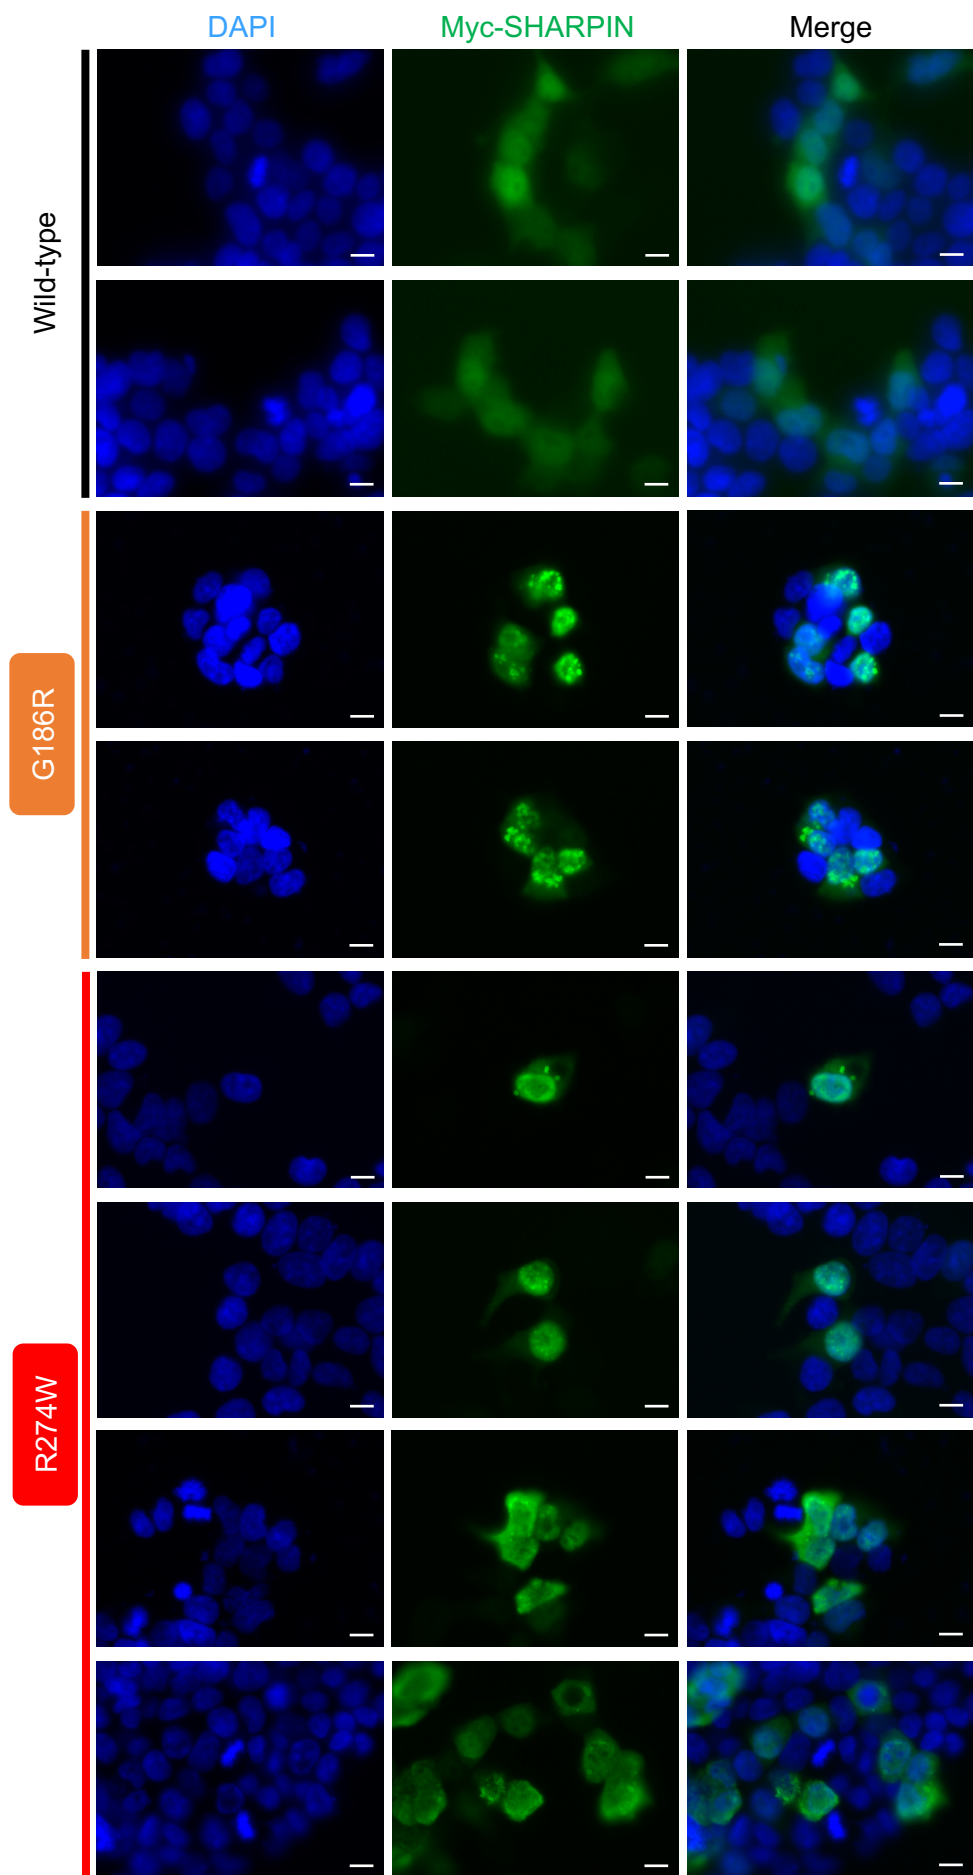

**Figure S1.** Detailed images of immunocytochemistry in Figure 2c, 2d, and 2e. Scale bar: 10  $\mu\text{m}$ .
